# Supplementary material for: Barriers and Facilitators to Home Dialysis Among Latinx Patients with Kidney Disease
Source: PubMed Central journal article supplement (PMC10427944; doi:10.1001/jamanetworkopen.2023.28944), 2023-08-15
Supplement: jamanetwopen-e2328944-s001.pdf [file jamanetwopen-e2328944-s001.pdf]

## Supplemental Online Content

Rizzolo K, Gonzalez Jauregui R, Barrientos I, et al. Barriers and facilitators to home dialysis among Latinx patients with kidney disease. *JAMA Netw Open*. 2023;6(8):e2328944. doi:10.1001/jamanetworkopen.2023.28944

### **eAppendix.** Participant interview guide

This supplemental material has been provided by the authors to give readers additional information about their work.

**eAppendix.** Participant interview guide

1. Establish a trusting and personalized relationship with the participant so that the participant does not feel threatened by the interview.
2. *Explore the home dialysis experience*
  - a. Can you describe your experience receiving home dialysis?
  - b. What is the best aspect of home dialysis? What is the worst?
3. *Explore the participant's pre-dialysis experience*
  - a. Was home dialysis discussed with you as an option before you started on dialysis?
  - b. Did you receive education regarding dialysis modalities before starting dialysis?
4. *Explore the participant's motivations for doing home dialysis:*
  - a. Why did you choose to do home dialysis?
  - b. Can you describe some of the conversations that took place about the pros/cons of each dialysis modality?
  - c. Was your family part of the conversation regarding modality choice?
  - d. Did you feel you received all the information that allowed you to make that decision?
  - e. What were your greatest motivations/concerns regarding home dialysis? Did your family have additional concerns about home dialysis?
5. *Explore any challenges to home dialysis:*
  - a. What has been challenging about home dialysis?
  - b. Does anyone help you with dialysis at home?
  - c. Do you have enough supplies?
  - d. Do you have any side effects from the dialysis?
  - e. How do you feel about your dialysis schedule?
  - f. Tell me about your diet on dialysis.
6. *Explore the participant's experience with home dialysis education and clinic:*
  - a. How has your experience been working with the clinic?
  - b. Tell me about your home dialysis education (when starting)
  - c. Do you have any issues with expenses or insurance for home dialysis?
  - d. Do you feel the doctors and nurses listen to your concerns?
7. *Explore the Latino community's concerns about home dialysis:*
  - a. What do you think is most concerning about home dialysis for the Latino community from XXX (replace XXX with country of origin)?
