# Supplementary material for: Barriers and Facilitators to Home Dialysis Among Latinx Patients with Kidney Disease
Source: PubMed Central journal article supplement (PMC10427944; doi:10.1001/jamanetworkopen.2023.28944), 2023-08-15
Supplement: jamanetwopen-e2328944-s002.pdf [file jamanetwopen-e2328944-s002.pdf]

## Data Sharing Statement

Rizzolo. Barriers and Facilitators to Home Dialysis Among Latinx Patients with Kidney Disease. *JAMA Netw Open*. Published August 15, 2023. doi:10.1001/jamanetworkopen.2023.28944

### Data

**Data available:** Yes

**Data types:** Deidentified participant data

**How to access data:** Data will be shared upon request by emailing [katherine.rizzolo@cuanschutz.edu](mailto:katherine.rizzolo@cuanschutz.edu)

**When available:** With publication

### Supporting Documents

**Document types:** None

### Additional Information

**Who can access the data:** to research whose proposed use of the data has been approved

**Types of analyses:** for a specified purpose

**Mechanisms of data availability:** after approval of a proposal
